# Supplementary material
Source: PubMed Central journal article supplement (PMC9236209)
Supplement: ehp10281.s001.acco.pdf [file ehp10281.s001.acco.pdf]

**Note to readers with disabilities:** *EHP* strives to ensure that all journal content is accessible to all readers. However, some figures and Supplemental Material published in *EHP* articles may not conform to [508 standards](#) due to the complexity of the information being presented. If you need assistance accessing journal content, please contact [ehp508@niehs.nih.gov](mailto:ehp508@niehs.nih.gov). Our staff will work with you to assess and meet your accessibility needs within 3 working days.

### **Supplemental Material**

#### **The Role of Fecal Microbiota in Liver Toxicity Induced by Perfluorooctane Sulfonate in Male and Female Mice**

Lilong Jiang, Yanjun Hong, Pingting Xiao, Xiaoxiao Wang, Jinghui Zhang, Ehu Liu, Huijun Li, and Zongwei Cai

#### **Table of Contents**

**Figure S1. The effects of PFOS on the fecal microbiota community structures in male and female mice.** Taxonomic cladogram of bacterial 16S rDNA sequences in the feces of control and PFOS-exposed male (A) and female (B) mice. (C) PCA plot based on bacterial 16S rDNA gene sequence abundance in the feces. (D) Sex-specific bacterial genera alteration in the feces of control and 10 mg/kg PFOS-exposed male and female mice. The bacterial abundances were calculated from the data of 16S sequencing. The fold difference illustrates the ratio between the average bacterial abundances of 10 mg/kg PFOS exposure group and the average bacterial abundances of control group (n = 5). Colored notes in cladogram show the important microbiota in the indicated groups, and the yellow notes represent the microbiota that do not show any importance in groups. PFOS: Perfluorooctane sulfonate. PCA: Principal component analysis. M: male mice, M1-M4: control, 1 mg/kg, 5 mg/kg and 10 mg/kg. F: female, F1-F4: control, 1 mg/kg, 5 mg/kg and 10 mg/kg. G: Genus. Summary data can be found in Table S8. \*p < 0.05, \*\*p < 0.01 compared with the control group.

**Figure S2. The effects of PFOS on the metabolic profiles of fecal samples of male and female mice.** (A) PLS-DA score plots for discriminating the fecal metabolome in male mice. (B) Pathway analysis of differential metabolites in male mice. (C) PLS-DA score plots for discriminating the fecal metabolome in female mice. (D) Pathway analysis of differential metabolites in female mice. (E) Rank pathway term analysis of differential metabolites in male mice. (F) Rank pathway term analysis of differential metabolites in female mice. (G) Comparison of arginine levels in feces of male and female mice. (H) Comparison of proline levels in feces of male and female mice. The relative abundance was calculated by the ratio between the level of metabolite concentration in PFOS-exposed group and the average level of control group. PFOS: Perfluorooctane sulfonate. PLS-DA: Partial least squares discrimination analysis. Summary data can be found in Table S9 and Excel Tables S5 and S6. Statistical significance was analyzed by one-way ANOVA among multiple groups. n = 8-11. \*p < 0.05 compared with the control group.

**Figure S3. The effects of ABX and FMT on the relative abundance of proline in the mice liver with PFOS exposure.** (A) Bacterial DNA contents in indicated male mice groups. n = 4. (B) Bacterial DNA contents in indicated female mice groups. n = 4. (C) The relative abundance of proline in the liver of indicated male and female mice groups. n = 8-10. The relative abundance was calculated by the ratio between the level of metabolite concentration in exposure group and the average level of control group. P: PFOS, Perfluorooctane sulfonate. ABX: antibiotic treatment. FMT: fecal microbiota transplantation. Summary data can be found in Table S10. Statistical significance was analyzed by one-way ANOVA. \*\*p < 0.01, \*\*\*p < 0.001 compared with the indicated group. Results were presented as the mean ± SD.

**Figure S4. The effects of bacterial administration on PFOS-induced liver injury.** (A) Comparison proportion of *L. Reuteri* levels in feces detected by sequencing analysis. n = 5. (B-D) Relative abundance of specific live bacteria in the indicated groups measured by qPCR. n = 3-5. (E) The relative abundance of arginine in feces of male mice. n = 6-8. (F) The relative abundance of arginine in feces of female mice. n = 6-8. (G-H) Histopathology of liver tissues in male mice treated with killed EF (G) and LR (H). (I) Histopathology of liver tissues in female mice treated with killed AKK. The relative abundance was calculated by the ratio between the level of metabolite concentration in exposure group and the average level of control group. P: PFOS, Perfluorooctane sulfonate. LR: *L. Reuteri*. EF: *E. faecalis*. AKK: *Akk. Muciniphila*. scale bar = 25 µm. Summary data can be found in Table S11. Statistical significance was analyzed by one-way ANOVA. \*\*p < 0.01, \*\*\*p < 0.001 compared with the indicated group. Results were presented as the mean ± SD.

**Figure S5. The effects of PFOS on the expressions of mTOR and P70S6K.** (A) Expression of phosphorylated mTOR and P70S6K in fixed liver tissues of male mice treated with or without PFOS. (B) Expression of phosphorylated mTOR and P70S6K in fixed liver tissues of female mice treated with or without PFOS. The relative intensity represents the ratio between the expression level of phosphorylated protein (p-mTOR and p-P70S6K) and the total protein expression level (mTOR and P70S6K). PFOS: Perfluorooctane sulfonate. mTOR: Mammalian target of rapamycin. Summary data can be found in Table S12. Statistical significance was analyzed by one-way ANOVA. n=3. \*p < 0.05, \*\*p < 0.01, \*\*\*p < 0.001 compared with the control group. Results were presented as the mean ± SD.

**Figure S6. The effects of PFOS on the expressions of mTOR and P70S6K.** (A) Expressions of mTOR and P70S6K in fixed liver tissues of male mice treated with or without PFOS. (B) Expressions of mTOR and P70S6K in fixed liver tissues of female mice treated with or without PFOS. PFOS: Perfluorooctane sulfonate. mTOR: Mammalian target of rapamycin.

**Figure S7. The effects of PFOS on the expressions of mTOR and P70S6K.** (A) Expressions of mTOR and P70S6K in fixed liver tissues of male mice in the indicated groups. (B) Expressions of mTOR and P70S6K in fixed liver tissues of female mice in the indicated groups. P: PFOS, Perfluorooctane sulfonate. LR: *L. Reuteri*. EF: *E. faecalis*. AKK: *Akk. Muciniphila*. mTOR: Mammalian target of rapamycin.

**Table S1.** Hepatosomatic indices (%) of the mice liver treated with 2 mg/kg PFOS in pre-experiments.

**Table S2.** Summary data for Fig. 1B, C, D and E.

**Table S3.** Summary data for Fig. 2B, D, E and F.

**Table S4.** Summary data for Fig. 3I and J.

**Table S5.** Summary data for Fig. 4B, C, F and G.

**Table S6.** Summary data for Fig. 5A, C, F and G.

**Table S7.** Summary data for Fig. 6A and B.

**Table S8.** Summary data for Fig. S1D.

**Table S9.** Summary data for Fig. S2G and H.

**Table S10.** Summary data for Fig. S3.

**Table S11.** Summary data for Fig. S4A, B, C, D, E and F.

**Table S12.** Summary data for Fig. S5A and B.

**Additional File-** Excel Document

**A**

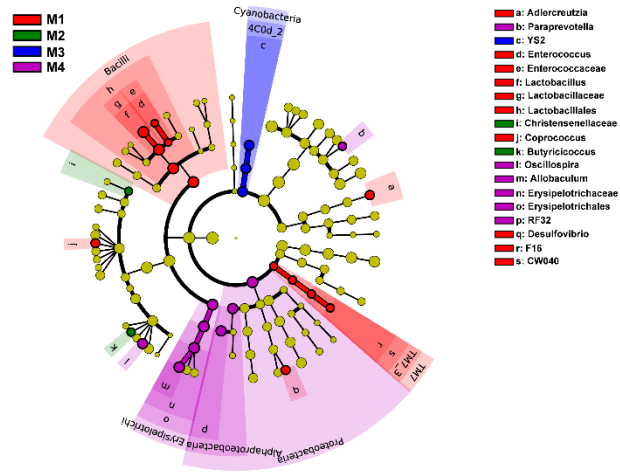

**B**

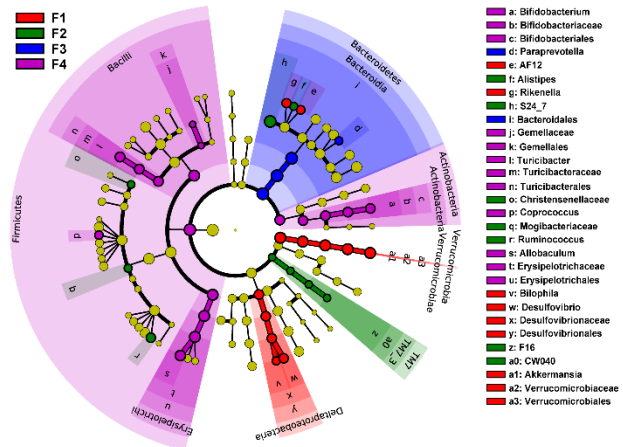

**C**

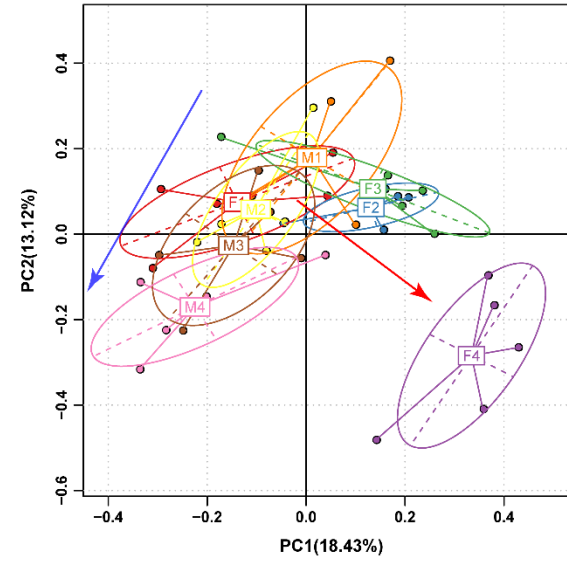

**D**

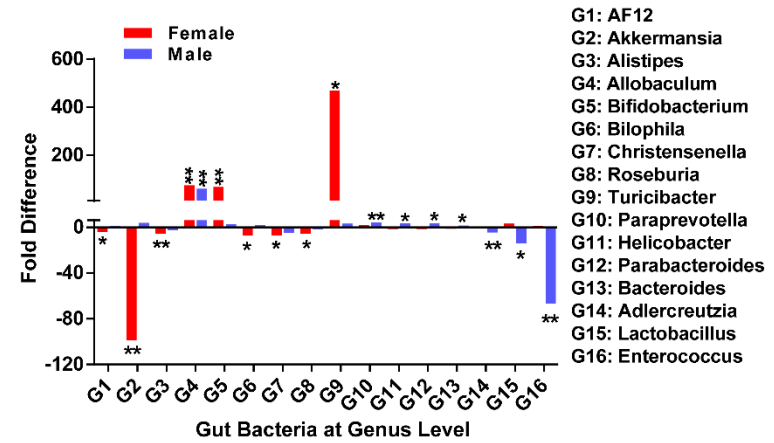

**Fig. S1 The effects of PFOS on the fecal microbiota community structures in male and female mice.** Taxonomic cladogram of bacterial 16S rDNA sequences in the feces of control and PFOS-exposed male (A) and female (B) mice. (C) PCA plot based on bacterial 16S rDNA gene sequence abundance in the feces. (D) Sex-specific bacterial genera alteration in the feces of control and 10 mg/kg PFOS-exposed male and female mice. The bacterial abundances were calculated from the data of 16S sequencing. The fold difference illustrates the ratio between the average bacterial abundances of 10 mg/kg PFOS exposure group and the average bacterial abundances of control group (n = 5). Colored notes in cladogram show the important microbiota in the indicated groups, and the yellow notes represent the microbiota that do not show any importance in groups. PFOS: Perfluorooctane sulfonate. PCA: Principal component analysis. M: male mice, M1-M4: control, 1 mg/kg, 5 mg/kg and 10 mg/kg. F: female, F1-F4: control, 1 mg/kg, 5 mg/kg and 10 mg/kg. G: Genus. Summary data can be found in Table S8. \*p < 0.05, \*\*p < 0.01 compared with the control group.

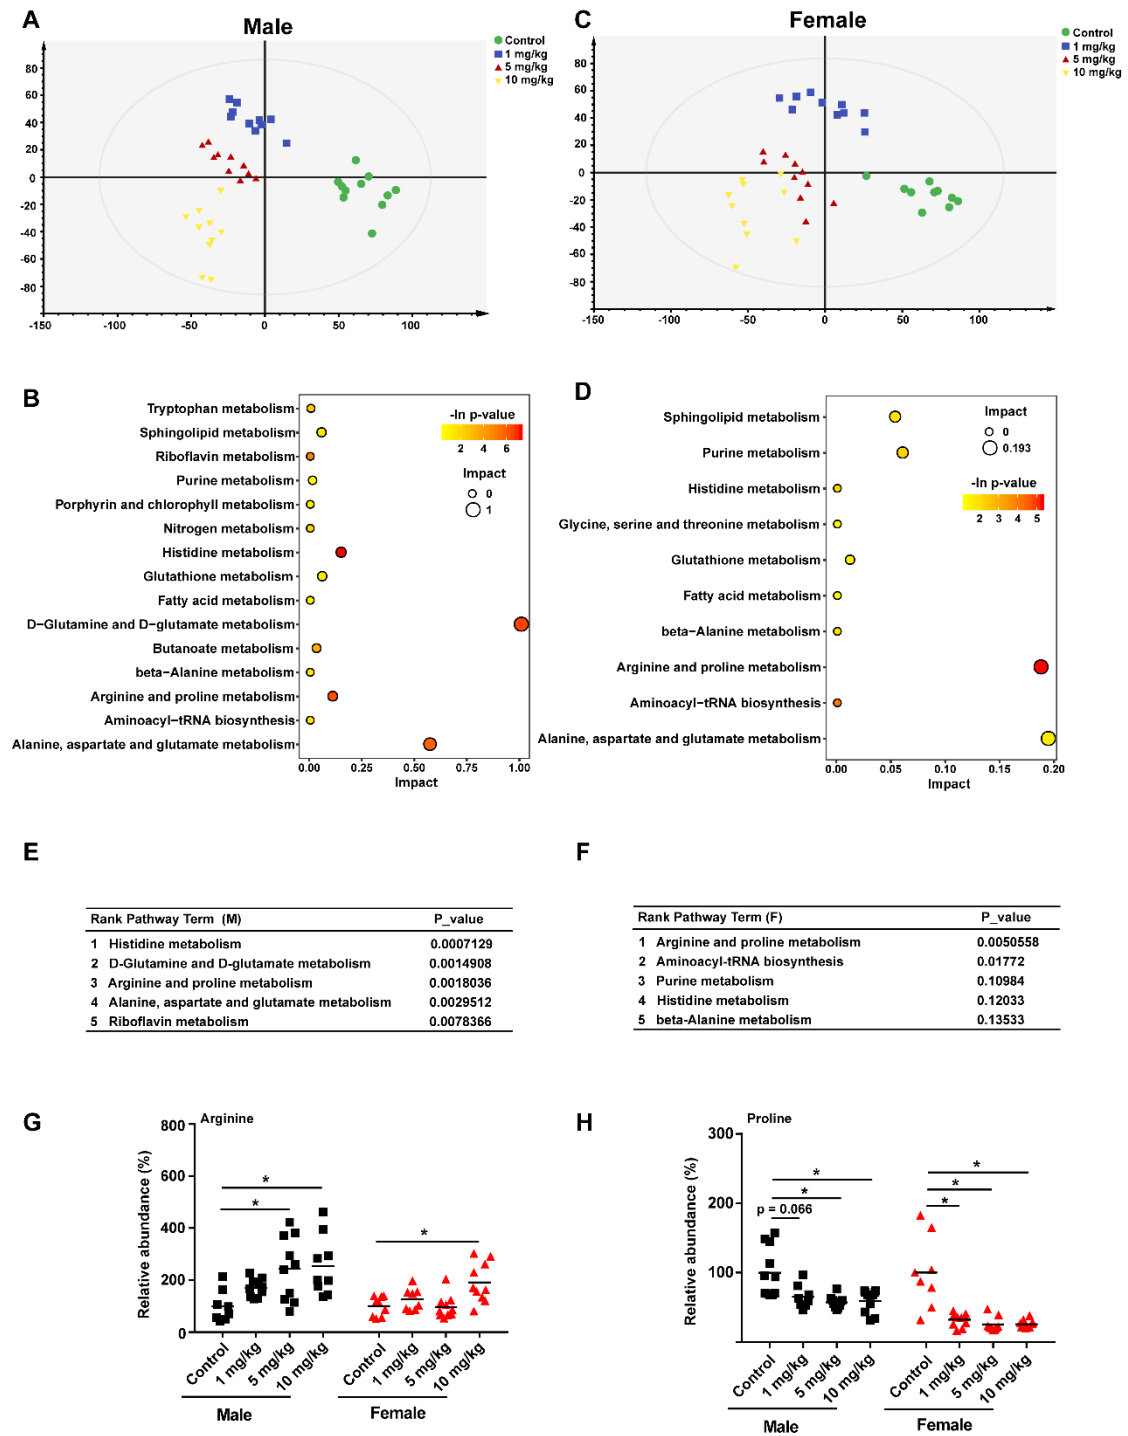

**Fig. S2 The effects of PFOS on the metabolic profiles of fecal samples of male and female mice.** (A) PLS-DA score plots for discriminating the fecal metabolome in male mice. (B) Pathway analysis of differential metabolites in male mice. (C) PLS-DA score plots for discriminating the fecal metabolome in female mice. (D) Pathway analysis of

differential metabolites in female mice. (E) Rank pathway term analysis of differential metabolites in male mice. (F) Rank pathway term analysis of differential metabolites in female mice. (G) Comparison of arginine levels in feces of male and female mice. (H) Comparison of proline levels in feces of male and female mice. The relative abundance was calculated by the ratio between the level of metabolite concentration in PFOS-exposed group and the average level of control group. PFOS: Perfluorooctane sulfonate. PLS-DA: Partial least squares discrimination analysis. Summary data can be found in Table S9 and Excel Tables S5 and S6. Statistical significance was analyzed by one-way ANOVA among multiple groups. n = 8-11. \*p < 0.05 compared with the control group.

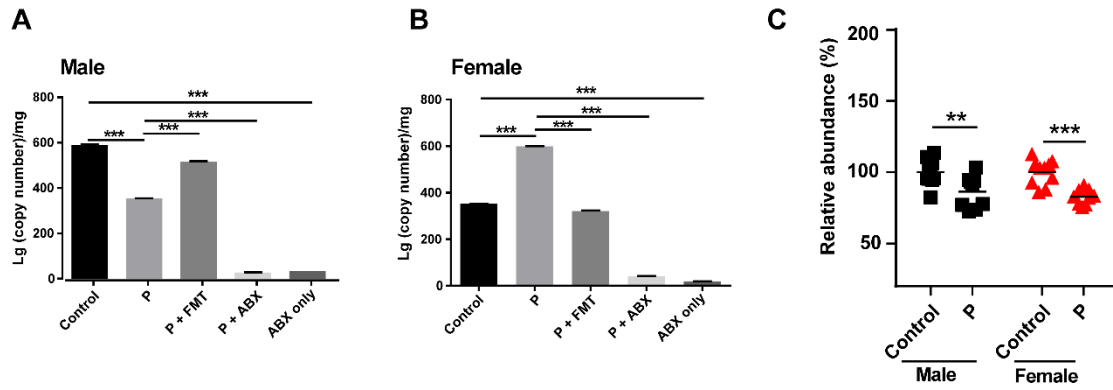

**Fig. S3 The effects of ABX and FMT on the relative abundance of proline in the mice liver with PFOS exposure.** (A) Bacterial DNA contents in indicated male mice groups.  $n = 4$ . (B) Bacterial DNA contents in indicated female mice groups.  $n = 4$ . (C) The relative abundance of proline in the liver of indicated male and female mice groups.  $n = 8-10$ . The relative abundance was calculated by the ratio between the level of metabolite concentration in exposure group and the average level of control group. P: PFOS, Perfluorooctane sulfonate. ABX: antibiotic treatment. FMT: fecal microbiota transplantation. Summary data can be found in Table S10. Statistical significance was analyzed by one-way ANOVA. \*\*  $p < 0.01$ , \*\*\*  $p < 0.001$  compared with the indicated group. Results were presented as the mean  $\pm$  SD.



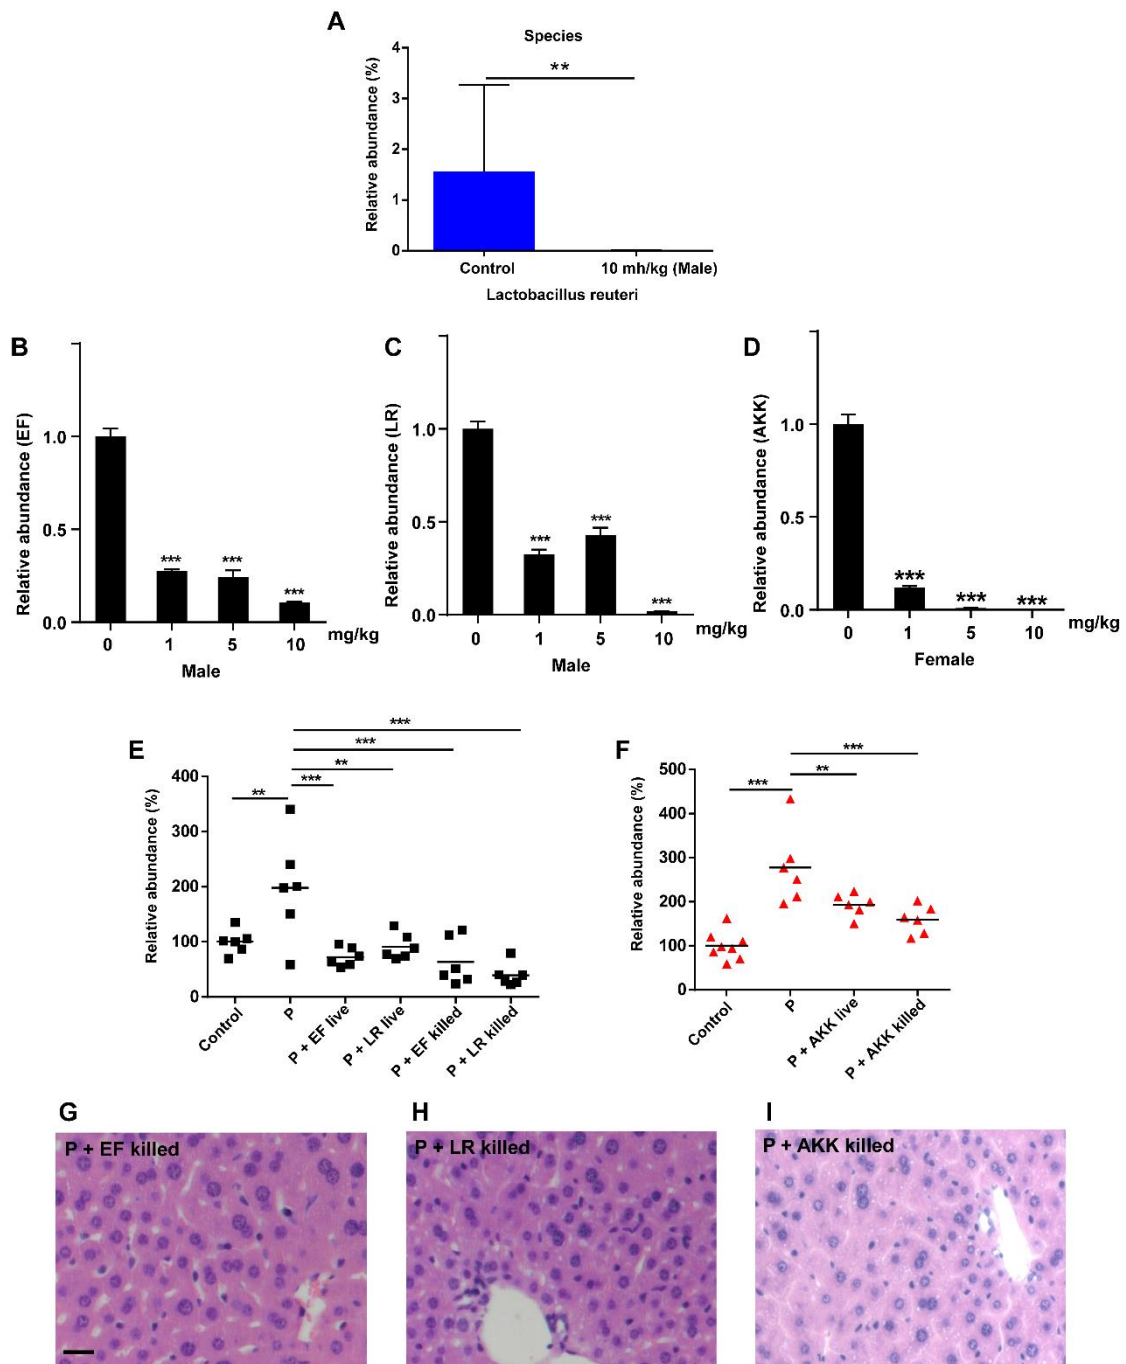

**Fig. S4 The effects of bacterial administration on PFOS-induced liver injury.** (A) Comparison proportion of *L. Reuteri* levels in feces detected by sequencing analysis. n = 5. (B-D) Relative abundance of specific live bacteria in the indicated groups measured by qPCR. n = 3-5. (E) The relative abundance of arginine in feces of male mice. n = 6-

8. (F) The relative abundance of arginine in feces of female mice. n = 6-8. (G-H) Histopathology of liver tissues in male mice treated with killed EF (G) and LR (H). (I) Histopathology of liver tissues in female mice treated with killed AKK. The relative abundance was calculated by the ratio between the level of metabolite concentration in exposure group and the average level of control group. P: PFOS, Perfluorooctane sulfonate. LR: *L. Reuteri*. EF: *E. faecalis*. AKK: *Akk. Muciniphila*. scale bar = 25  $\mu$ m. Summary data can be found in Table S11. Statistical significance was analyzed by one-way ANOVA. \*\*p < 0.01, \*\*\*p < 0.001 compared with the indicated group. Results were presented as the mean  $\pm$  SD.

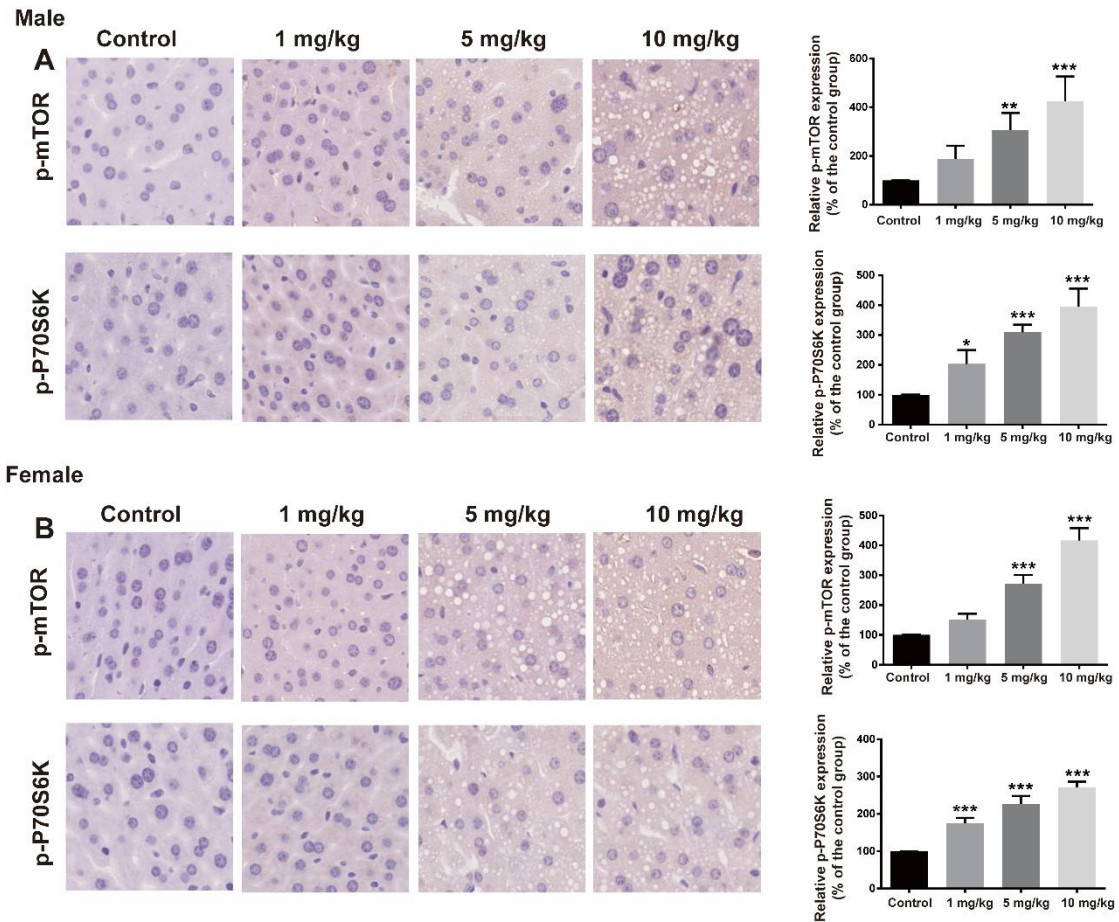

**Fig. S5 The effects of PFOS on the expressions of mTOR and P70S6K.** (A) Expression of phosphorylated mTOR and P70S6K in fixed liver tissues of male mice treated with or without PFOS. (B) Expression of phosphorylated mTOR and P70S6K in fixed liver tissues of female mice treated with or without PFOS. The relative intensity represents the ratio between the expression level of phosphorylated protein (p-mTOR and p-P70S6K) and the total protein expression level (mTOR and P70S6K). PFOS: Perfluorooctane sulfonate. mTOR: Mammalian target of rapamycin. Summary data can be found in Table S12. Statistical significance was analyzed by one-way ANOVA.  $n=3$ . \*  $p < 0.05$ , \*\*  $p < 0.01$ , \*\*\*  $p < 0.001$  compared with the control group. Results were presented as the mean  $\pm$  SD.

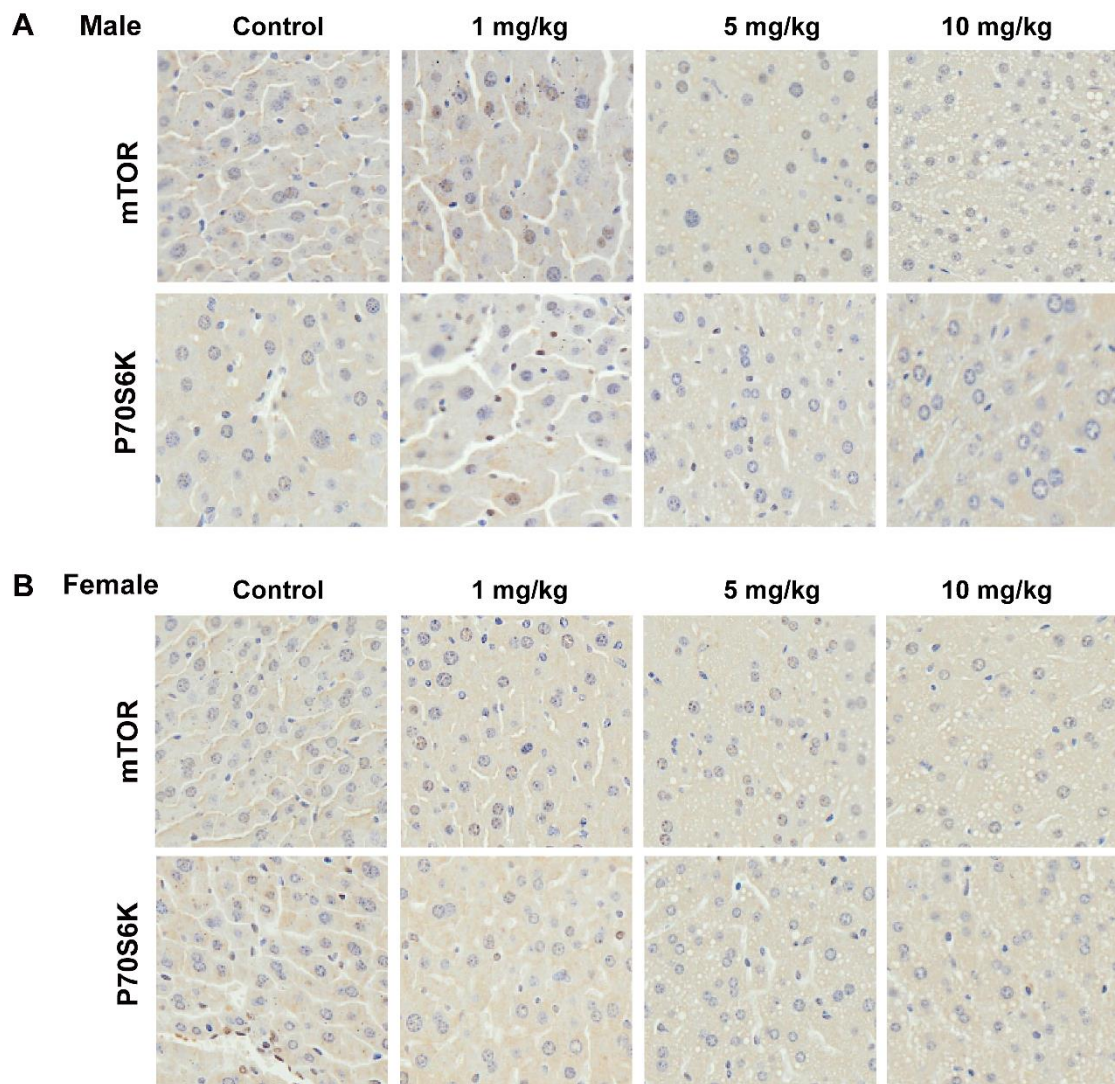

**Fig. S6 The effects of PFOS on the expressions of mTOR and P70S6K.** (A) Expressions of mTOR and P70S6K in fixed liver tissues of male mice treated with or without PFOS. (B) Expressions of mTOR and P70S6K in fixed liver tissues of female mice treated with or without PFOS. PFOS: Perfluorooctane sulfonate. mTOR: Mammalian target of rapamycin.



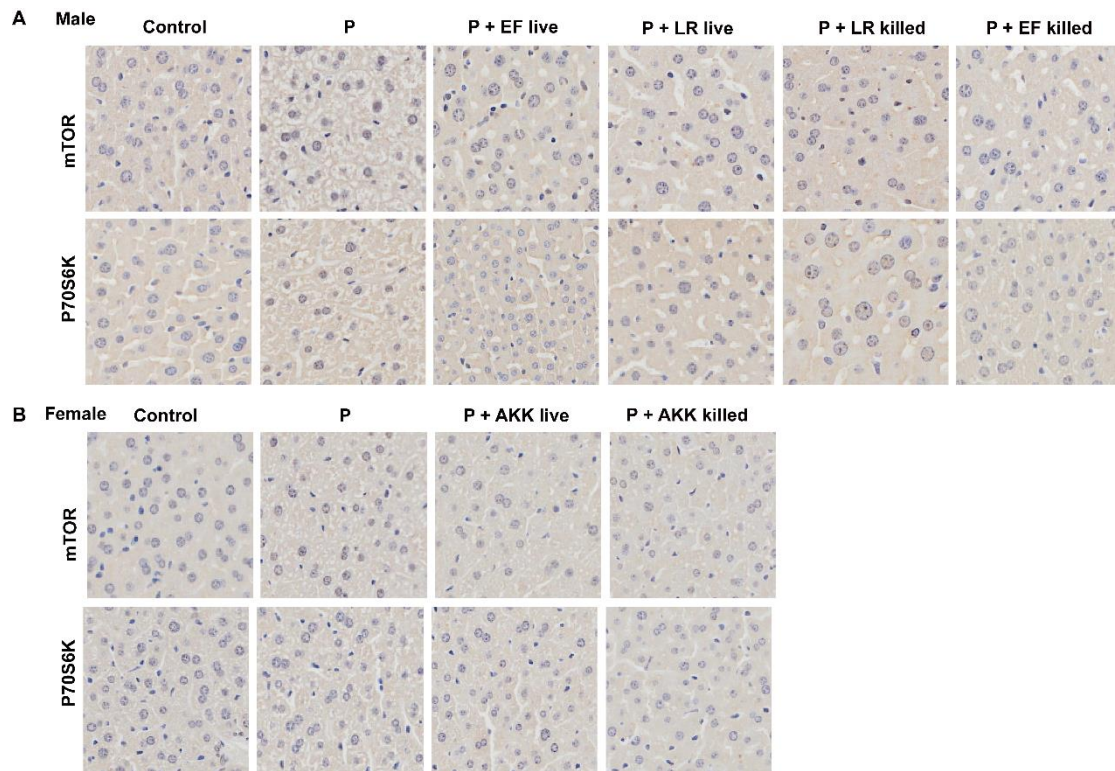

**Fig. S7 The effects of PFOS on the expressions of mTOR and P70S6K.** (A) Expressions of mTOR and P70S6K in fixed liver tissues of male mice in the indicated groups. (B) Expressions of mTOR and P70S6K in fixed liver tissues of female mice in the indicated groups. P: PFOS, Perfluorooctane sulfonate. LR: *L. Reuteri*. EF: *E. faecalis*. AKK: *Akk. Muciniphila*. mTOR: Mammalian target of rapamycin.

**Table S1 Hepatosomatic indices (%) of the mice liver treated with 2 mg/kg PFOS in pre-experiments.**

|        | Control     | 2 mg/kg     |
|--------|-------------|-------------|
| Male   | 3.68 ± 0.20 | 4.91 ± 0.26 |
| Female | 4.97        | 5.56 ± 0.40 |

Note: PFOS: Perfluorooctane sulfonate. The pre-experiments were performed to select a dosage with moderate liver injury in mice for fecal microbiota transplantation and antibiotic treatment studies. Mice were exposed to either 2 or 5 mg/kg PFOS via daily oral gavage once daily for 14 days. Twenty-four hours after the last dose, the liver was collected, and the hepatosomatic index was calculated as the percentage of the ratio of liver weight (g) to body weight (g). While 5 mg/kg PFOS dosage induced severe liver injury in mice (Fig. 1B), 2 mg/kg dosage exposure (14 days) induced moderate liver injury and was selected for further study. n = 1-3 for both male and female mice. Significant differences were not calculated in the pre-experiments. The results just provided the reference for the selection of 2 mg/kg dosage in the formal experiments.

**Table S2 Summary data for Fig. 1B, C, D and E**

| <b>Fig 1B</b> | Hepatosomatic index (%) | Control     | 1 mg/kg     | 5 mg/kg     | 10 mg/kg    |
|---------------|-------------------------|-------------|-------------|-------------|-------------|
|               | Male                    | 4.08 ± 0.34 | 4.82 ± 0.44 | 7.48 ± 0.47 | 9.49 ± 0.56 |
|               | Female                  | 3.73 ± 0.21 | 4.22 ± 0.19 | 6.66 ± 0.40 | 9.70 ± 0.66 |

| <b>Fig 1C</b> | ALT activity (U/L) | Control     | 1 mg/kg     | 5 mg/kg      | 10 mg/kg      |
|---------------|--------------------|-------------|-------------|--------------|---------------|
|               | Male               | 8.38 ± 4.94 | 8.08 ± 1.64 | 18.80 ± 7.76 | 43.15 ± 17.52 |
|               | Female             | 4.00 ± 1.84 | 5.48 ± 2.10 | 11.32 ± 3.72 | 36.68 ± 16.90 |

| <b>Fig 1D</b> | AST activity (U/L) | Control      | 1 mg/kg      | 5 mg/kg      | 10 mg/kg     |
|---------------|--------------------|--------------|--------------|--------------|--------------|
|               | Male               | 21.55 ± 4.97 | 22.71 ± 6.08 | 21.54 ± 4.98 | 33.79 ± 6.40 |
|               | Female             | 24.39 ± 3.86 | 24.29 ± 3.23 | 31.21 ± 5.32 | 30.84 ± 5.22 |

| <b>Fig 1E</b> | ALP activity (U/L) | Control       | 1 mg/kg      | 5 mg/kg      | 10 mg/kg      |
|---------------|--------------------|---------------|--------------|--------------|---------------|
|               | Male               | 21.85 ± 10.32 | 33.84 ± 6.71 | 32.20 ± 3.75 | 38.70 ± 11.73 |
|               | Female             | 21.92 ± 8.51  | 33.88 ± 6.73 | 36.13 ± 8.92 | 33.63 ± 8.73  |

Note: For ALT activity analysis, ALT reacted with alanine and  $\alpha$ -ketoglutarate, and produced pyruvic acid. Pyruvic acid was then reacted with 2,4-dinitrophenylhydrazine (DNPH) to form phenylhydrazone, which could be dissolved in sodium hydroxide and then detected at 505nm. For AST activity analysis, AST catalyzed aspartate and  $\alpha$ -ketoglutarate to form oxalacetate and glutamate. Oxalacetate could decarboxylate automatically to pyruvic acid, which could react with DNPH and then detected at 510nm. For ALP activity analysis, ALP catalyzed disodium phenyl phosphate to form phenol, which could react with 4-aminoantipyrine and potassium ferricyanide, and could be detected at around 520nm. Hepatosomatic index was calculated as the percentage of the ratio of liver weight (g) to body weight (g). n = 8-11. ALT: Alanine aminotransferase. AST: Aspartate aminotransferase. ALP: Alkaline phosphatase.

**Table S3 Summary data for Fig. 2B, D, E and F**

| <b>Fig 2B and D</b> | Alpha diversity (observed OTUs) | 0 mg/kg        | 1 mg/kg        | 5 mg/kg        | 10 mg/kg       |
|---------------------|---------------------------------|----------------|----------------|----------------|----------------|
|                     | Male                            | 395.20 ± 47.80 | 407.40 ± 17.05 | 375.20 ± 12.28 | 373.40 ± 40.01 |
|                     | Female                          | 348.20 ± 30.78 | 419.80 ± 30.46 | 395.00 ± 25.70 | 397.40 ± 27.52 |

|                | Male-relative abundance (%) |         |         |          |
|----------------|-----------------------------|---------|---------|----------|
| <b>Fig 2E</b>  | 0 mg/kg                     | 1 mg/kg | 5 mg/kg | 10 mg/kg |
| Lactobacillus  | 7.36                        | 5.67    | 4.95    | 0.53     |
| Oscillospira   | 1.78                        | 1.12    | 0.82    | 2.20     |
| Adlercreutzia  | 0.54                        | 0.25    | 0.19    | 0.12     |
| Desulfovibrio  | 0.39                        | 0.13    | 0.063   | 0.22     |
| Coprococcus    | 0.34                        | 0.14    | 0.28    | 0.21     |
| Butyricoccus   | 0.084                       | 0.12    | 0.027   | 0.061    |
| Allobaculum    | 0.074                       | 0.67    | 1.09    | 4.43     |
| Paraprevotella | 0.028                       | 0.027   | 0.052   | 0.11     |
| Enterococcus   | 0.028                       | 0.019   | 0.019   | 0.00042  |
| Escherichia    | 0                           | 0       | 0.00082 | 0.018    |

|               | Female-relative abundance (%) |         |         |          |
|---------------|-------------------------------|---------|---------|----------|
| <b>Fig 2F</b> | 0 mg/kg                       | 1 mg/kg | 5 mg/kg | 10 mg/kg |
| Akkermansia   | 16.17                         | 2.38    | 2.84    | 0.16     |



|                 |        |         |         |       |
|-----------------|--------|---------|---------|-------|
| Prevotella      | 6.57   | 4.63    | 4.49    | 1.04  |
| Desulfovibrio   | 1.13   | 0.38    | 0.075   | 0.16  |
| Rikenella       | 0.63   | 0.30    | 0.10    | 0.14  |
| AF12            | 0.29   | 0.24    | 0.12    | 0.078 |
| Bilophila       | 0.17   | 0.075   | 0.028   | 0.023 |
| Alistipes       | 0.13   | 0.13    | 0.085   | 0.024 |
| Coprococcus     | 0.11   | 0.11    | 0.11    | 0.26  |
| Allobaculum     | 0.093  | 1.14    | 0.42    | 6.95  |
| Paraprevotella  | 0.039  | 0.040   | 0.10    | 0.063 |
| Bifidobacterium | 0.027  | 0.37    | 0.25    | 1.78  |
| Turicibacter    | 0.0048 | 0.00081 | 0.00083 | 2.25  |

Note: n = 5.

**Table S4 Summary data for Fig. 3I and J**

| <b>Fig 3I</b> | Relative abundance (%) - Arginine | 0 mg/kg        | 1 mg/kg        | 5 mg/kg         | 10 mg/kg        |
|---------------|-----------------------------------|----------------|----------------|-----------------|-----------------|
|               | Male                              | 100.00 ± 21.05 | 154.06 ± 74.34 | 295.43 ± 107.51 | 415.69 ± 220.94 |
|               | Female                            | 100.00 ± 36.00 | 119.95 ± 61.66 | 190.05 ± 70.61  | 388.30 ± 190.44 |

| <b>Fig 3J</b> | Relative abundance (%) - Proline | 0 mg/kg        | 1 mg/kg        | 5 mg/kg        | 10 mg/kg       |
|---------------|----------------------------------|----------------|----------------|----------------|----------------|
|               | Male                             | 100.00 ± 14.12 | 107.72 ± 28.74 | 131.08 ± 9.79  | 123.41 ± 15.64 |
|               | Female                           | 100.00 ± 28.09 | 114.24 ± 23.69 | 141.32 ± 11.17 | 128.96 ± 18.35 |

Note: n = 8-11.

| <b>Fig 3I- actual measured values</b> | Ratio between intensities of arginine and the internal standard | 0 mg/kg                   | 1 mg/kg                   | 5 mg/kg                   | 10 mg/kg                  |
|---------------------------------------|-----------------------------------------------------------------|---------------------------|---------------------------|---------------------------|---------------------------|
|                                       | Male                                                            | 0.069022591 ± 0.014526771 | 0.106339601 ± 0.051314282 | 0.203913873 ± 0.074203956 | 0.286920799 ± 0.152498646 |
|                                       | Female                                                          | 0.130367623 ± 0.046930922 | 0.15637837 ± 0.080385322  | 0.247759899 ± 0.092056884 | 0.50621457 ± 0.248275028  |

| <b>Fig 3J- actual measured values</b> | Ratio between intensities of proline and the internal | 0 mg/kg | 1 mg/kg | 5 mg/kg | 10 mg/kg |
|---------------------------------------|-------------------------------------------------------|---------|---------|---------|----------|
|                                       |                                                       |         |         |         |          |

|  |          |                              |                              |                              |                                 |
|--|----------|------------------------------|------------------------------|------------------------------|---------------------------------|
|  | standard |                              |                              |                              |                                 |
|  | Male     | 36.99470964 ±<br>5.221912944 | 39.84961111 ±<br>10.63174848 | 48.49275993 ±<br>3.621766676 | 45.65616264<br>±<br>5.786170206 |
|  | Female   | 40.36369171 ±<br>11.33741718 | 46.11227368 ±<br>9.560844823 | 57.04218667 ±<br>4.506983375 | 52.05133427<br>±<br>7.408030754 |

**Table S5 Summary data for Fig. 4B, C, F and G**

| <b>Fig 4B and C</b> | Hepatosomatic index (%) | Control     | P           | P + ABX     | P + FMT     |
|---------------------|-------------------------|-------------|-------------|-------------|-------------|
|                     | Male                    | 4.62 ± 0.18 | 6.28 ± 0.52 | 5.26 ± 0.24 | 5.73 ± 0.29 |
|                     | Female                  | 3.97 ± 0.25 | 5.49 ± 0.32 | 4.60 ± 0.13 | 5.05 ± 0.23 |

| <b>Fig 4F</b> | Relative abundance (%) - Hepatic arginine | Control        | P              | P + ABX       | P + FMT        | ABX           |
|---------------|-------------------------------------------|----------------|----------------|---------------|----------------|---------------|
|               | Male                                      | 100.00 ± 30.14 | 205.17 ± 46.04 | 91.56 ± 49.16 | 128.26 ± 24.88 | 82.46 ± 24.48 |
|               | Female                                    | 100.00 ± 12.68 | 154.02 ± 39.79 | 89.89 ± 42.69 | 89.54 ± 28.37  | 93.80 ± 21.97 |

| <b>Fig 4G</b> | Relative abundance (%) - Fecal arginine | Control        | P               | P + ABX          | P + FMT        | ABX              |
|---------------|-----------------------------------------|----------------|-----------------|------------------|----------------|------------------|
|               | Male                                    | 100.00 ± 49.39 | 306.93 ± 99.77  | 836.66 ± 166.74  | 155.48 ± 81.23 | 781.14 ± 238.42  |
|               | Female                                  | 100.00 ± 37.23 | 281.09 ± 125.74 | 1494.88 ± 486.59 | 97.35 ± 26.17  | 1552.38 ± 274.43 |

Note: n = 8-10. P: Perfluorooctane sulfonate. ABX: antibiotic treatment, FMT: fecal microbiota transplantation.

| <b>Fig 4F-<br/>actual<br/>measured<br/>values</b> | Hepatic<br>arginine-<br>Ratio<br>between<br>intensities<br>of<br>arginine<br>and the<br>internal<br>standard | Control                         | P                               | P + ABX                         | P + FMT                         | ABX                             |
|---------------------------------------------------|--------------------------------------------------------------------------------------------------------------|---------------------------------|---------------------------------|---------------------------------|---------------------------------|---------------------------------|
|                                                   | Male                                                                                                         | 0.026399301<br>±<br>0.007956411 | 0.054163324<br>±<br>0.012153047 | 0.024171273<br>±<br>0.012978209 | 0.033860725<br>±<br>0.006568348 | 0.021767998<br>±<br>0.006461411 |
|                                                   | Female                                                                                                       | 0.034635245<br>±<br>0.00439002  | 0.053346242<br>±<br>0.013782627 | 0.031013437<br>±<br>0.009824434 | 0.031134341<br>±<br>0.014784152 | 0.032486282<br>±<br>0.007608523 |

| <b>Fig 4G-<br/>actual<br/>measured<br/>values</b> | Fecal<br>arginine-<br>Ratio<br>between<br>intensities<br>of arginine<br>and the<br>internal<br>standard | Control                      | P                            | P + ABX                      | P + FMT                     | ABX                          |
|---------------------------------------------------|---------------------------------------------------------------------------------------------------------|------------------------------|------------------------------|------------------------------|-----------------------------|------------------------------|
|                                                   | Male                                                                                                    | 0.020302134 ±<br>0.010026691 | 0.062314043 ±<br>0.020255893 | 0.169859093 ±<br>0.033851616 | 0.031565557 ±<br>0.01649069 | 0.158587759 ±<br>0.048405023 |
|                                                   | Female                                                                                                  | 0.013207867 ±<br>0.004917805 | 0.037126112 ±<br>0.016607629 | 0.197442412 ±<br>0.06426833  | 0.012857852 ±<br>0.0034566  | 0.205035731 ±<br>0.036246714 |

**Table S6 Summary data for Fig. 5A, C, F and G**

| <b>Fig 5A</b> | Relative abundance (%)       | Control       | 10 mg/kg          |
|---------------|------------------------------|---------------|-------------------|
|               | Lactobacillales (A1)         | 7.40 ± 7.62   | 0.55 ± 0.73       |
|               | Lactobacillaceae (A2)        | 7.36 ± 7.62   | 0.53 ± 0.75       |
|               | Lactobacillus (A3)           | 7.36 ± 7.62   | 0.53 ± 0.75       |
|               | Enterococcaceae (A4)         | 0.028 ± 0.017 | 0.00042 ± 0.00093 |
|               | Enterococcus (A5)            | 0.028 ± 0.017 | 0.00042 ± 0.00093 |
|               | Verrucomicrobiaceae (A6)     | 16.17 ± 9.17  | 0.16 ± 0.36       |
|               | Akkermansia (A7)             | 16.17 ± 9.17  | 0.16 ± 0.36       |
|               | Akkermansia muciniphila (A8) | 16.17 ± 9.17  | 0.16 ± 0.36       |

| <b>Fig 5C</b> | Hepatosomatic index (%) | Control     | P           | P + EF live | P + LR live | P + EF killed | P + LR killed |
|---------------|-------------------------|-------------|-------------|-------------|-------------|---------------|---------------|
|               | Male                    | 3.96 ± 0.27 | 6.67 ± 0.30 | 4.84 ± 0.39 | 4.86 ± 0.24 | 4.88 ± 0.20   | 4.67 ± 0.21   |

| <b>Fig 5C</b> | Hepatosomatic index (%) | Control     | P           | P + AKK live | P + AKK killed |
|---------------|-------------------------|-------------|-------------|--------------|----------------|
|               | Female                  | 4.04 ± 0.28 | 5.41 ± 0.18 | 4.80 ± 0.11  | 5.16 ± 0.19    |

| <b>Fig 5F</b> | Relative abundance (%) | Control        | P               | P + EF live    | P + LR live    | P + EF killed  | P + LR killed  |
|---------------|------------------------|----------------|-----------------|----------------|----------------|----------------|----------------|
|               | Male                   | 100.00 ± 18.12 | 404.92 ± 157.97 | 152.44 ± 33.85 | 195.11 ± 97.30 | 136.56 ± 20.17 | 206.63 ± 47.24 |

| <b>Fig 5G</b> | Relative abundance (%) | Control        | P              | P + AKK live   | P + AKK killed |
|---------------|------------------------|----------------|----------------|----------------|----------------|
|               | Female                 | 100.00 ± 29.67 | 149.15 ± 20.42 | 110.96 ± 24.46 | 121.37 ± 20.09 |

Note: n = 8-10. P: Perfluorooctane sulfonate. LR: *L. Reuteri*, EF: *E. faecalis*, AKK: *Akk.*

*Muciniphila*.

| <b>Fig 5F-<br/>actual<br/>measured<br/>values</b> | Hepatic arginine-<br>Ratio<br>between<br>intensities of<br>arginine and<br>the internal<br>standard | Control                             | P                                       | P + EF<br>live                       | P + LR<br>live                       | P + EF<br>killed                     | P + LR<br>killed                     |
|---------------------------------------------------|-----------------------------------------------------------------------------------------------------|-------------------------------------|-----------------------------------------|--------------------------------------|--------------------------------------|--------------------------------------|--------------------------------------|
|                                                   | Male                                                                                                | 0.04188<br>415 ±<br>0.00759<br>0716 | 0.1695<br>96159<br>±<br>0.0661<br>63923 | 0.06384<br>8729 ±<br>0.01417<br>5764 | 0.08172<br>1403 ±<br>0.04075<br>1893 | 0.05719<br>8707 ±<br>0.00844<br>6963 | 0.08654<br>5754 ±<br>0.01978<br>5022 |

| <b>Fig 5G-<br/>actual<br/>measured<br/>values</b> | Hepatic arginine-<br>Ratio between<br>intensities of<br>arginine and the<br>internal standard | Control                         | P                               | P + AKK<br>live                | P + AKK<br>killed              |
|---------------------------------------------------|-----------------------------------------------------------------------------------------------|---------------------------------|---------------------------------|--------------------------------|--------------------------------|
|                                                   | Female                                                                                        | 0.038559357<br>±<br>0.011439739 | 0.057509426<br>±<br>0.007874974 | 0.042786684<br>±<br>0.00943053 | 0.04679821<br>±<br>0.007746512 |

**Table S7 Summary data for Fig. 6A and B**

| <b>Fig 6A</b> | Relative p-mTOR expression (% of the control group) | Control       | P              | P + EF live   | P + LR live   | P + EF killed | P + LR killed |
|---------------|-----------------------------------------------------|---------------|----------------|---------------|---------------|---------------|---------------|
|               | Male                                                | 100.00 ± 1.07 | 239.64 ± 21.84 | 123.68 ± 1.55 | 124.05 ± 4.88 | 172.27 ± 4.26 | 176.82 ± 5.12 |

| <b>Fig 6A</b> | Relative p-P70S6K expression (% of the control group) | Control       | P              | P + EF live    | P + LR live    | P + EF killed  | P + LR killed  |
|---------------|-------------------------------------------------------|---------------|----------------|----------------|----------------|----------------|----------------|
|               | Male                                                  | 100.00 ± 0.31 | 326.92 ± 31.38 | 198.05 ± 28.56 | 197.47 ± 16.34 | 222.61 ± 21.98 | 226.96 ± 22.41 |

| <b>Fig 6B</b> | Relative p-mTOR expression (% of the control group) | Control       | P              | P + AKK live  | P + AKK killed |
|---------------|-----------------------------------------------------|---------------|----------------|---------------|----------------|
|               | Female                                              | 100.00 ± 0.91 | 249.44 ± 28.32 | 123.91 ± 4.25 | 180.99 ± 18.28 |

| <b>Fig 6B</b> | Relative p-P70S6K expression (% of the control group) | Control       | P              | P + AKK live   | P + AKK killed |
|---------------|-------------------------------------------------------|---------------|----------------|----------------|----------------|
|               | Female                                                | 100.00 ± 0.82 | 213.75 ± 20.50 | 130.65 ± 20.02 | 152.38 ± 11.79 |

Note: n = 3. P: Perfluorooctane sulfonate. mTOR: Mammalian target of rapamycin. LR:

*L. Reuteri*, EF: *E. faecalis*, AKK: *Akk. Muciniphila*.



| <b>Fig 6A-<br/>actual<br/>measured<br/>values</b> | p-mTOR<br>expression | Control                         | P                               | P + EF live                    | P + LR live                     | P + EF<br>killed               | P + LR<br>killed                |
|---------------------------------------------------|----------------------|---------------------------------|---------------------------------|--------------------------------|---------------------------------|--------------------------------|---------------------------------|
|                                                   | Male                 | 0.997751198<br>±<br>0.010707932 | 2.391033313<br>±<br>0.217955541 | 1.234032321<br>±<br>0.01550843 | 1.237753771<br>±<br>0.048645592 | 1.71881657<br>±<br>0.042503314 | 1.764185853<br>±<br>0.051114333 |

| <b>Fig 6A-<br/>actual<br/>measured<br/>values</b> | p-P70S6K<br>expression | Control                         | P                               | P + EF live                     | P + LR live                     | P + EF<br>killed                | P + LR<br>killed               |
|---------------------------------------------------|------------------------|---------------------------------|---------------------------------|---------------------------------|---------------------------------|---------------------------------|--------------------------------|
|                                                   | Male                   | 0.995091306<br>±<br>0.003120881 | 3.253136886<br>±<br>0.312304404 | 1.970737914<br>±<br>0.284245689 | 1.964975523<br>±<br>0.162589574 | 2.215194316<br>±<br>0.218710354 | 2.25849388<br>±<br>0.222985102 |

| <b>Fig 6B-<br/>actual<br/>measured<br/>values</b> | p-mTOR<br>expression | Control                         | P                               | P + AKK<br>live                 | P + AKK<br>killed              |
|---------------------------------------------------|----------------------|---------------------------------|---------------------------------|---------------------------------|--------------------------------|
|                                                   | Female               | 1.010456515<br>±<br>0.009181529 | 2.520502667<br>±<br>0.286170398 | 1.252010919<br>±<br>0.042899717 | 1.82885823<br>±<br>0.184691985 |

| <b>Fig 6B-<br/>actual<br/>measured<br/>values</b> | p-P70S6K<br>expression | Control                       | P                               | P + AKK<br>live                 | P + AKK<br>killed               |
|---------------------------------------------------|------------------------|-------------------------------|---------------------------------|---------------------------------|---------------------------------|
|                                                   | Female                 | 1.00208246<br>±<br>0.00817589 | 2.141938952<br>±<br>0.205395652 | 1.309249198<br>±<br>0.200579989 | 1.526959658<br>±<br>0.118174553 |

**Table S8 Summary data for Fig. S1D**

| <b>Figure S1D</b> | Fold difference (10 mg/kg vs. Control) | Male   | Female |
|-------------------|----------------------------------------|--------|--------|
|                   | G1                                     | 1.12   | -3.76  |
|                   | G2                                     | 3.82   | -98.77 |
|                   | G3                                     | -2.90  | -5.49  |
|                   | G4                                     | 59.59  | 74.50  |
|                   | G5                                     | 2.38   | 66.98  |
|                   | G6                                     | 1.77   | -7.14  |
|                   | G7                                     | -4.87  | -6.84  |
|                   | G8                                     | -1.64  | -5.64  |
|                   | G9                                     | 3.10   | 468.85 |
|                   | G10                                    | 4.05   | 1.61   |
|                   | G11                                    | 3.52   | -1.47  |
|                   | G12                                    | 3.34   | -1.55  |
|                   | G13                                    | 1.56   | -1.29  |
|                   | G14                                    | -4.69  | -1.11  |
|                   | G15                                    | -14.01 | 3.04   |
|                   | G16                                    | -66.78 | 1.02   |

Note: “-” indicated that PFOS-treated mice had significantly lower bacterial abundances. PFOS: Perfluorooctane sulfonate. G: genus.

| <b>Figure S1D<br/>actual<br/>measured<br/>values of 0<br/>mg/kg and 10<br/>mg/kg groups</b> | Relative<br>abundance<br>(%) | Male-0 mg/kg           | Male-10<br>mg/kg           | Female-0<br>mg/kg       | Female-<br>10 mg/kg       |
|---------------------------------------------------------------------------------------------|------------------------------|------------------------|----------------------------|-------------------------|---------------------------|
|                                                                                             | G1                           | 0.30429 ±<br>0.348464  | 0.341986 ±<br>0.4803<br>53 | 0.29158 ±<br>0.221665   | 0.077568<br>±<br>0.063663 |
|                                                                                             | G2                           | 4.27556 ±<br>3.77576   | 16.352922 ±<br>9.732615    | 16.169607 ±<br>9.174985 | 0.163716<br>±<br>0.362672 |
|                                                                                             | G3                           | 0.127315 ±<br>0.158873 | 0.043854 ±<br>0.020356     | 0.131338 ±<br>0.089567  | 0.023942<br>±<br>0.017259 |
|                                                                                             | G4                           | 0.07426 ±<br>0.052115  | 4.425235 ±<br>3.079619     | 0.093278 ±<br>0.059322  | 6.94967 ±<br>5.182951     |
|                                                                                             | G5                           | 0.191328 ±<br>0.215489 | 0.45615 ±<br>0.480968      | 0.026645 ±<br>0.027047  | 1.784651<br>± 1.69673     |
|                                                                                             | G6                           | 0.081512 ±<br>0.080588 | 0.144675 ±<br>0.107254     | 0.167438 ±<br>0.108175  | 0.023454<br>±<br>0.023696 |
|                                                                                             | G7                           | 0.005804 ±<br>0.00633  | 0.001193 ±<br>0.001089     | 0.002792 ±<br>0.002258  | 0.000408<br>±<br>0.000912 |
|                                                                                             | G8                           | 0.00455 ±<br>0.009122  | 0.002767 ±<br>0.006187     | 0.009157 ±<br>0.001707  | 0.001624<br>±<br>0.002657 |
|                                                                                             | G9                           | 0.042713 ±<br>0.073657 | 0.132492 ±<br>0.154155     | 0.004795 ±<br>0.008554  | 2.248125<br>±<br>0.606816 |
|                                                                                             | G10                          | 0.028285 ±<br>0.01106  | 0.114646 ±<br>0.057087     | 0.038963 ±<br>0.021969  | 0.062824<br>±<br>0.059242 |
|                                                                                             | G11                          | 0.862783 ±<br>0.550485 | 3.032973 ±<br>1.726229     | 3.447228 ±<br>3.984886  | 2.349771<br>±<br>1.799486 |
|                                                                                             | G12                          | 0.402318 ±<br>0.105421 | 1.34258 ±<br>0.82091       | 0.406054 ±<br>0.235654  | 0.262308<br>±<br>0.288879 |
|                                                                                             | G13                          | 9.179983 ±<br>3.417691 | 14.35912 ±<br>3.244313     | 8.636494 ±<br>2.015126  | 6.672421<br>± 3.61246     |
|                                                                                             | G14                          | 0.541383 ±<br>0.309034 | 0.115538 ±<br>0.089943     | 0.291208 ±<br>0.070067  | 0.261937<br>±<br>0.119354 |

|  |     |                        |                        |                        |                            |
|--|-----|------------------------|------------------------|------------------------|----------------------------|
|  | G15 | 7.359306 ±<br>7.618082 | 0.525287 ±<br>0.751838 | 3.322033 ±<br>4.010776 | 10.092741<br>±<br>5.497853 |
|  | G16 | 0.027782 ±<br>0.016822 | 0.000416 ±<br>0.000931 | 0.000408 ±<br>0.000912 | 0.000418<br>±<br>0.000934  |

**Table S9 Summary data for Fig. S2G and H**

| <b>Fig S2G</b> | Relative abundance (%) - Arginine | Control        | 1 mg/kg        | 5 mg/kg            | 10 mg/kg        |
|----------------|-----------------------------------|----------------|----------------|--------------------|-----------------|
|                | Male                              | 100.00 ± 60.82 | 170.28 ± 34.35 | 244.21 ±<br>123.25 | 254.48 ± 113.32 |
|                | Female                            | 100.00 ± 37.13 | 126.90 ± 42.36 | 97.11 ± 44.04      | 191.07 ± 75.79  |

| <b>Fig S2H</b> | Relative abundance (%) - Proline | Control        | 1 mg/kg       | 5 mg/kg       | 10 mg/kg      |
|----------------|----------------------------------|----------------|---------------|---------------|---------------|
|                | Male                             | 100.00 ± 35.41 | 65.28 ± 16.69 | 57.19 ± 8.52  | 59.12 ± 17.02 |
|                | Female                           | 100 ± 51.88    | 32.01 ± 9.39  | 25.35 ± 10.52 | 25.73 ± 5.91  |

Note: n = 8-11.

| <b>Fig S2G-<br/>actual<br/>measured<br/>values</b> | Ratio between intensities of arginine and the internal standard | Control                      | 1 mg/kg                      | 5 mg/kg                      | 10 mg/kg                     |
|----------------------------------------------------|-----------------------------------------------------------------|------------------------------|------------------------------|------------------------------|------------------------------|
|                                                    | Male                                                            | 1.211215453 ±<br>0.736633621 | 2.062487118 ±<br>0.416132151 | 2.957845173 ±<br>1.492843595 | 3.082258268 ±<br>1.372553037 |
|                                                    | Female                                                          | 1.754760941 ±<br>0.651594727 | 2.226656727 ±<br>0.743235857 | 1.703961571 ±<br>0.772802769 | 3.352825443 ±<br>1.329872745 |

| <b>Fig S2H-<br/>actual<br/>measured<br/>values</b> | Ratio between<br>intensities of<br>proline and the<br>internal standard | Control                      | 1 mg/kg                      | 5 mg/kg                      | 10 mg/kg                     |
|----------------------------------------------------|-------------------------------------------------------------------------|------------------------------|------------------------------|------------------------------|------------------------------|
|                                                    | Male                                                                    | 23.82965523 ±<br>8.438010129 | 15.55518102 ±<br>3.976586516 | 13.62813482 ±<br>2.031109962 | 14.08885321 ±<br>4.055395441 |
|                                                    | Female                                                                  | 57.97630525 ±<br>30.07537214 | 18.55993259 ±<br>5.443139737 | 14.69526487 ±<br>6.096841524 | 14.91801937 ±<br>3.425789784 |

**Table S10 Summary data for Fig. S3**

| <b>Fig S3A and B</b> | Lg (copy number)/mg | Control       | P             | P + FMT       | P + ABX      | ABX only     |
|----------------------|---------------------|---------------|---------------|---------------|--------------|--------------|
|                      | Male                | 589.52 ± 2.65 | 353.03 ± 1.16 | 515.28 ± 2.94 | 27.82 ± 0.29 | 32.92 ± 0.21 |
|                      | Female              | 351.35 ± 1.72 | 598.75 ± 1.57 | 320.74 ± 2.72 | 41.25 ± 0.57 | 18.76 ± 0.13 |

Note: n = 4. P: Perfluorooctane sulfonate. ABX: antibiotic treatment. FMT: fecal microbiota transplantation.

| <b>Fig S3C</b> | Relative abundance (%) | Control       | P             |
|----------------|------------------------|---------------|---------------|
|                | Male                   | 100.00 ± 9.18 | 86.37 ± 11.17 |
|                | Female                 | 100.00 ± 8.89 | 82.85 ± 5.20  |

Note: n = 8-10. P: Perfluorooctane sulfonate.

| <b>Fig S3C-actual measured values</b> | Ratio between intensities of proline and the internal standard | Control                   | P                         |
|---------------------------------------|----------------------------------------------------------------|---------------------------|---------------------------|
|                                       | Male                                                           | 114.5966445 ± 10.52197604 | 98.98168281 ± 12.79722434 |
|                                       | Female                                                         | 117.4671085 ± 10.44220445 | 97.31715834 ± 6.103782578 |

**Table S11 Summary data for Fig. S4A, B, C, D, E and F**

|                |                        |             |                 |
|----------------|------------------------|-------------|-----------------|
| <b>Fig S4A</b> | Relative abundance (%) | Control     | 10 mg/kg        |
|                | Lactobacillus reuteri  | 1.56 ± 1.71 | 0.0085 ± 0.0090 |

Note: n = 5.

|                |                         |              |               |              |               |
|----------------|-------------------------|--------------|---------------|--------------|---------------|
| <b>Fig S4B</b> | Relative abundance (EF) | 0 mg/kg      | 1 mg/kg       | 5 mg/kg      | 10 mg/kg      |
|                | Male                    | 1.00 ± 0.043 | 0.28 ± 0.0072 | 0.24 ± 0.035 | 0.10 ± 0.0052 |

Note: n = 3-5. EF: *E. faecalis*.

|                |                         |              |              |              |                 |
|----------------|-------------------------|--------------|--------------|--------------|-----------------|
| <b>Fig S4C</b> | Relative abundance (LR) | 0 mg/kg      | 1 mg/kg      | 5 mg/kg      | 10 mg/kg        |
|                | Male                    | 1.00 ± 0.040 | 0.32 ± 0.027 | 0.43 ± 0.041 | 0.019 ± 0.00080 |

Note: n = 3-5. LR: *L. Reuteri*.

|                |                          |              |               |                 |                    |
|----------------|--------------------------|--------------|---------------|-----------------|--------------------|
| <b>Fig S4D</b> | Relative abundance (AKK) | 0 mg/kg      | 1 mg/kg       | 5 mg/kg         | 10 mg/kg           |
|                | Female                   | 1.00 ± 0.052 | 0.12 ± 0.0085 | 0.010 ± 0.00061 | 0.00030 ± 4.37E-05 |

Note: n = 3-5. AKK: *Akk. Muciniphila*.

|                |                        |                |                |               |               |               |               |
|----------------|------------------------|----------------|----------------|---------------|---------------|---------------|---------------|
| <b>Fig S4E</b> | Relative abundance (%) | Control        | P              | P + EF live   | P + LR live   | P + EF killed | P + LR killed |
|                | Male                   | 100.00 ± 21.89 | 198.22 ± 93.53 | 72.67 ± 16.91 | 91.29 ± 23.27 | 63.52 ± 42.49 | 39.65 ± 20.84 |

Note: n = 6-8. P: Perfluorooctane sulfonate. LR: *L. Reuteri*. EF: *E. faecalis*. AKK: *Akk. Muciniphila*.

|            |          |         |   |              |                |
|------------|----------|---------|---|--------------|----------------|
| <b>Fig</b> | Relative | Control | P | P + AKK live | P + AKK killed |
|------------|----------|---------|---|--------------|----------------|

|            |               |                |                |                |                |
|------------|---------------|----------------|----------------|----------------|----------------|
| <b>S4F</b> | abundance (%) |                |                |                |                |
|            | Female        | 100.00 ± 32.04 | 277.87 ± 85.24 | 193.25 ± 25.49 | 159.19 ± 32.23 |

Note: n = 6-8. P: Perfluorooctane sulfonate. LR: *L. Reuteri*. EF: *E. faecalis*. AKK: *Akk.*

*Muciniphila*.

|                                        |      |                           |                          |                           |                           |
|----------------------------------------|------|---------------------------|--------------------------|---------------------------|---------------------------|
| <b>Fig S4B- actual measured values</b> | EF   | 0 mg/kg                   | 1 mg/kg                  | 5 mg/kg                   | 10 mg/kg                  |
|                                        | Male | 7.96589E-05 ± 3.39725E-06 | 2.2058E-05 ± 5.74743E-07 | 1.94342E-05 ± 2.77624E-06 | 8.34189E-06 ± 4.11855E-07 |

|                                        |      |                           |                           |                           |                           |
|----------------------------------------|------|---------------------------|---------------------------|---------------------------|---------------------------|
| <b>Fig S4C- actual measured values</b> | LR   | 0 mg/kg                   | 1 mg/kg                   | 5 mg/kg                   | 10 mg/kg                  |
|                                        | Male | 0.000494826 ± 1.98934E-05 | 0.000159906 ± 1.33858E-05 | 0.000211423 ± 2.03989E-05 | 9.19014E-06 ± 3.97562E-07 |

|                                        |        |                           |                           |                           |                           |
|----------------------------------------|--------|---------------------------|---------------------------|---------------------------|---------------------------|
| <b>Fig S4D- actual measured values</b> | AKK    | 0 mg/kg                   | 1 mg/kg                   | 5 mg/kg                   | 10 mg/kg                  |
|                                        | Female | 0.000652189 ± 3.38438E-05 | 7.83075E-05 ± 5.55637E-06 | 6.75527E-06 ± 3.95532E-07 | 1.96013E-07 ± 2.84723E-08 |

|                                        |                                                                 |                           |                           |                           |                           |                           |                           |
|----------------------------------------|-----------------------------------------------------------------|---------------------------|---------------------------|---------------------------|---------------------------|---------------------------|---------------------------|
| <b>Fig S4E- actual measured values</b> | Ratio between intensities of arginine and the internal standard | Control                   | P                         | P + EF live               | P + LR live               | P + EF killed             | P + LR killed             |
|                                        | Male                                                            | 0.173506279 ± 0.037986799 | 0.343928222 ± 0.162279954 | 0.126080295 ± 0.029336935 | 0.158386817 ± 0.040379263 | 0.110212726 ± 0.073728943 | 0.068789159 ± 0.036155296 |



|                                                    |                                                                 |                                 |                                 |                                 |                                 |
|----------------------------------------------------|-----------------------------------------------------------------|---------------------------------|---------------------------------|---------------------------------|---------------------------------|
| <b>Fig S4F-<br/>actual<br/>measured<br/>values</b> | Ratio between intensities of arginine and the internal standard | Control                         | P                               | P + AKK live                    | P + AKK killed                  |
|                                                    | Female                                                          | 0.011482495<br>±<br>0.003679216 | 0.031906282<br>±<br>0.009787179 | 0.022190001<br>±<br>0.002927457 | 0.018279539<br>±<br>0.003700917 |

**Table S12 Summary data for Fig. S5A and B**

|                |                                                     |               |                |                |                 |
|----------------|-----------------------------------------------------|---------------|----------------|----------------|-----------------|
| <b>Fig S5A</b> | Relative p-mTOR expression (% of the control group) | Control       | 1 mg/kg        | 5 mg/kg        | 10 mg/kg        |
|                | Male                                                | 100.00 ± 0.48 | 187.18 ± 54.89 | 305.20 ± 71.71 | 424.92 ± 101.96 |

|                |                                                       |               |                |                |                |
|----------------|-------------------------------------------------------|---------------|----------------|----------------|----------------|
| <b>Fig S5A</b> | Relative p-P70S6K expression (% of the control group) | Control       | 1 mg/kg        | 5 mg/kg        | 10 mg/kg       |
|                | Male                                                  | 100.00 ± 0.47 | 203.61 ± 46.13 | 309.31 ± 25.57 | 395.08 ± 60.40 |

|                |                                                     |                |                |                |                |
|----------------|-----------------------------------------------------|----------------|----------------|----------------|----------------|
| <b>Fig S5B</b> | Relative p-mTOR expression (% of the control group) | Control        | 1 mg/kg        | 5 mg/kg        | 10 mg/kg       |
|                | Female                                              | 100.00 ± 0.090 | 150.93 ± 20.23 | 271.69 ± 28.98 | 416.56 ± 41.05 |

|                |                              |         |         |         |          |
|----------------|------------------------------|---------|---------|---------|----------|
| <b>Fig S5B</b> | Relative p-P70S6K expression | Control | 1 mg/kg | 5 mg/kg | 10 mg/kg |
|----------------|------------------------------|---------|---------|---------|----------|

|  |                          |                 |                |                |                |
|--|--------------------------|-----------------|----------------|----------------|----------------|
|  | (% of the control group) |                 |                |                |                |
|  | Female                   | 100.00 ± 0.0093 | 175.31 ± 13.98 | 226.64 ± 21.34 | 270.67 ± 15.56 |

Note: n = 3. mTOR: Mammalian target of rapamycin.

|                                                    |                   |                           |                           |                           |                          |
|----------------------------------------------------|-------------------|---------------------------|---------------------------|---------------------------|--------------------------|
| <b>Fig S5A-<br/>actual<br/>measured<br/>values</b> | p-mTOR expression | Control                   | 1 mg/kg                   | 5 mg/kg                   | 10 mg/kg                 |
|                                                    | Male              | 1.001612839 ± 0.004779506 | 1.874868532 ± 0.549764679 | 3.056934629 ± 0.718282689 | 4.256026061 ± 1.02126754 |

|                                                    |                     |                           |                          |                           |                           |
|----------------------------------------------------|---------------------|---------------------------|--------------------------|---------------------------|---------------------------|
| <b>Fig S5A-<br/>actual<br/>measured<br/>values</b> | p-P70S6K expression | Control                   | 1 mg/kg                  | 5 mg/kg                   | 10 mg/kg                  |
|                                                    | Male                | 1.002069406 ± 0.004700499 | 2.040293808 ± 0.46226399 | 3.099482023 ± 0.256180497 | 3.958930823 ± 0.605201532 |

|                                                    |                   |                           |                           |                          |                           |
|----------------------------------------------------|-------------------|---------------------------|---------------------------|--------------------------|---------------------------|
| <b>Fig S5B-<br/>actual<br/>measured<br/>values</b> | p-mTOR expression | Control                   | 1 mg/kg                   | 5 mg/kg                  | 10 mg/kg                  |
|                                                    | Female            | 1.003176673 ± 0.000906625 | 1.514046054 ± 0.202963647 | 2.725537528 ± 0.29071039 | 4.178845234 ± 0.411796059 |

|                                                    |                     |                           |                           |                          |                           |
|----------------------------------------------------|---------------------|---------------------------|---------------------------|--------------------------|---------------------------|
| <b>Fig S5B-<br/>actual<br/>measured<br/>values</b> | p-P70S6K expression | Control                   | 1 mg/kg                   | 5 mg/kg                  | 10 mg/kg                  |
|                                                    | Female              | 1.002140753 ± 9.32231E-05 | 1.756848545 ± 0.140086363 | 2.27129019 ± 0.213876842 | 2.712478252 ± 0.155962589 |
